# Supplementary material
Source: PubMed Central journal article supplement (PMC4073935)
Supplement: am5018557_si_001.pdf [file am5018557_si_001.pdf]

## Supporting Information

### **Nerve Guidance Conduits (NGCs) Based on Double-layered Scaffolds of Electrospun Nanofibers for Repairing the Peripheral Nervous System**

*Jingwei Xie,<sup>†,§,‡</sup> Matthew R. MacEwan,<sup>†,§</sup> Wenyong Liu,<sup>⊥</sup> Nithya Jesuraj,<sup>§</sup> Xiaoran Li,<sup>§</sup>*

*Daniel Hunter,<sup>±</sup> and Younan Xia<sup>⊥,¶,\*</sup>*

<sup>§</sup>Department of Biomedical Engineering, Washington University, St. Louis, Missouri 63130, United States

<sup>⊥</sup>School of Chemical and Biomolecular Engineering, Georgia Institute of Technology, Atlanta, Georgia 30332, United States

<sup>±</sup>Division of Plastic and Reconstructive Surgery, Department of Surgery, Washington University School of Medicine, St. Louis, Missouri 63110, United States

<sup>¶</sup>The Wallace H. Coulter Department of Biomedical Engineering, Georgia Institute of Technology and Emory University; School of Chemistry and Biochemistry, Georgia Institute of Technology, Atlanta, Georgia 30332, United States

\*Address correspondence to Younan Xia (younan.xia@biomed.gatech.edu)

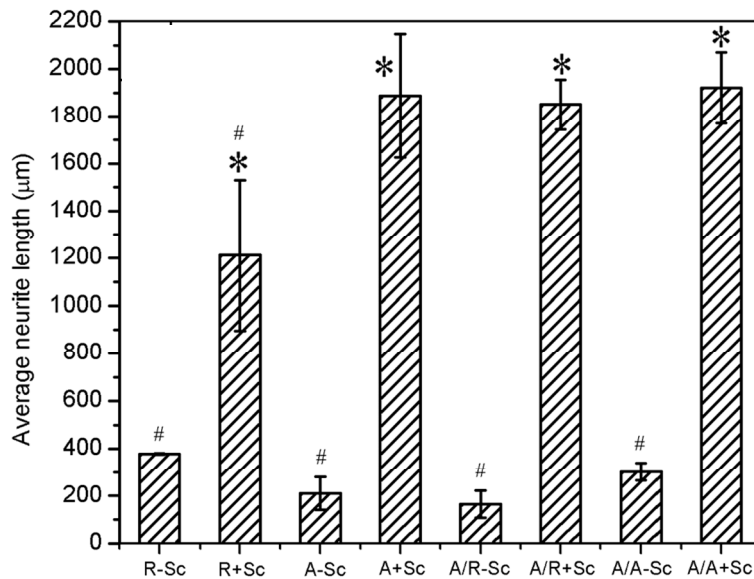

**Figure S1.** Average neurite length for DRGs cultured on different types of scaffolds. \* indicates  $p < 0.05$  for Samples +Sc compared with Samples -Sc under the same condition; # indicates  $p < 0.05$  for samples compared with A+Sc. Abbreviations: R-Sc and R+Sc: random PCL nanofibers in the absence and presence of pre-seeded Schwann cells. A-Sc and A+Sc: aligned PCL nanofibers in the absence and presence of pre-seeded Schwann cells. A/R-Sc and A/R+Sc: double-layered nanofiber scaffolds with aligned fibers in the top layer and random fibers in the bottom layer and in the absence or presence of pre-seeded Schwann cells. A/A-Sc and A/A+Sc: double-layered nanofiber scaffolds with aligned fibers in both layers but oriented perpendicular to each other and in the absence or presence of pre-seeded Schwann cells.
